# Supplementary material for: Sensitivity of asymmetric oxygen minimum zones to mixing intensity and stoichiometry in the tropical Pacific using a basin-scale model (OGCM-DMEC V1.4)
Source: Copernicus journal article supplement (doi:10.5194/gmd-15-1017-2022), 2022-02-03
Supplement: Supplementary file 1 [file gmd-15-1017-2022-supplement.pdf]

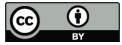

*Supplement of*

**Sensitivity of asymmetric oxygen minimum zones to mixing intensity and stoichiometry in the tropical Pacific using a basin-scale model (OGCM-DMEC V1.4)**

**Kai Wang et al.**

*Correspondence to:* Xiujun Wang (xwang@bnu.edu.cn)

The copyright of individual parts of the supplement might differ from the article licence.

**Table S1.** Model simulations with different parameterizations for oxygen to carbon (O:C) utilization ratio and background diffusion.

| Simulations  | O:C utilization ratio    | background diffusion |
|--------------|--------------------------|----------------------|
| Reference    | 1.3                      | 0                    |
| Kb0.1        | 1.3                      | 0.1                  |
| Kb0.25       | 1.3                      | 0.25                 |
| Kb0.5        | 1.3                      | 0.5                  |
| Km6.9        | $1.3 * DO / (DO + 6.9)$  | 0                    |
| Km18.7       | $1.3 * DO / (DO + 18.7)$ | 0                    |
| Km6.9Kb0.25  | $1.3 * DO / (DO + 6.9)$  | 0.25                 |
| Km6.9Kb0.5   | $1.3 * DO / (DO + 6.9)$  | 0.5                  |
| Km18.7Kb0.25 | $1.3 * DO / (DO + 18.7)$ | 0.25                 |
| Km18.7Kb0.5  | $1.3 * DO / (DO + 18.7)$ | 0.5                  |

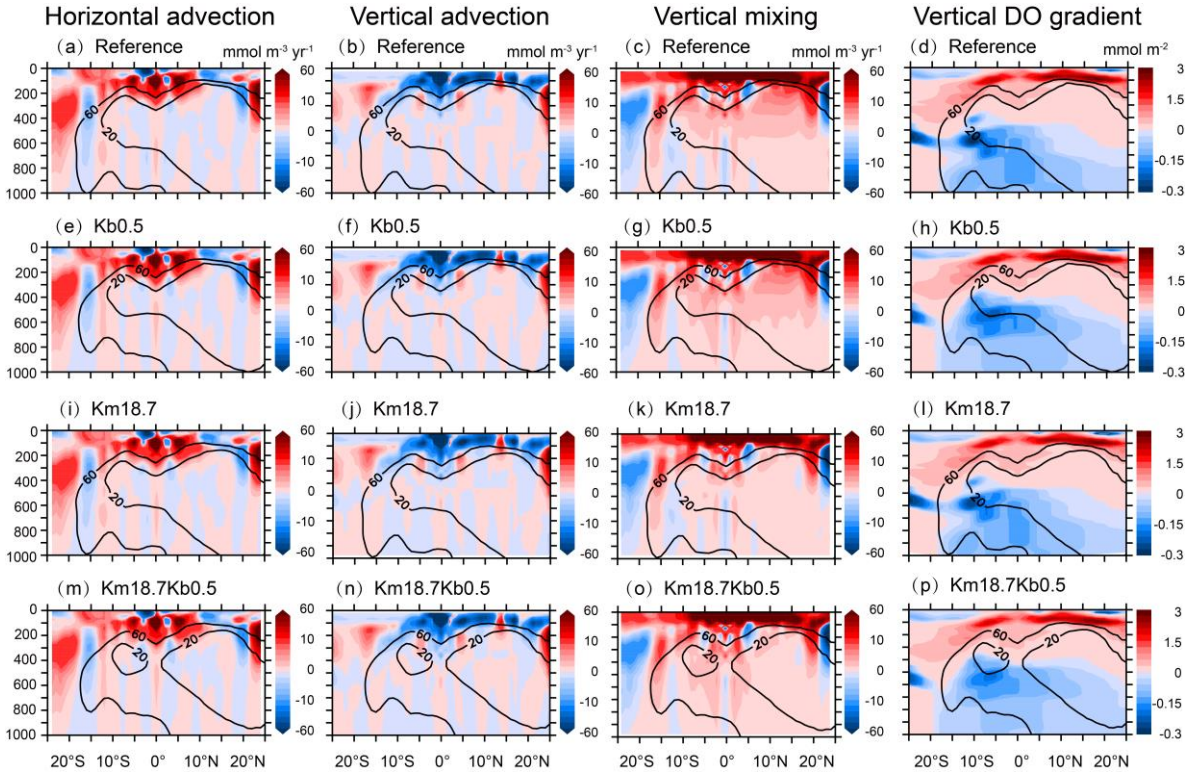

10 **Figure S1.** Simulated DO flux by horizontal advection, vertical advection, vertical mixing and vertical DO gradient over 120-90°W from the reference run (**a, b, c, and d**), an enhanced vertical mixing (**e, f, g, and h**), a reduced O:C utilization ratio (**i, j, k, and l**), and combination of an enhanced vertical mixing and a reduced O:C utilization ratio (**m, n, o, and p**). Black lines denote contours of DO concentrations of 20 mmol m<sup>-3</sup> and 60 mmol m<sup>-3</sup>.

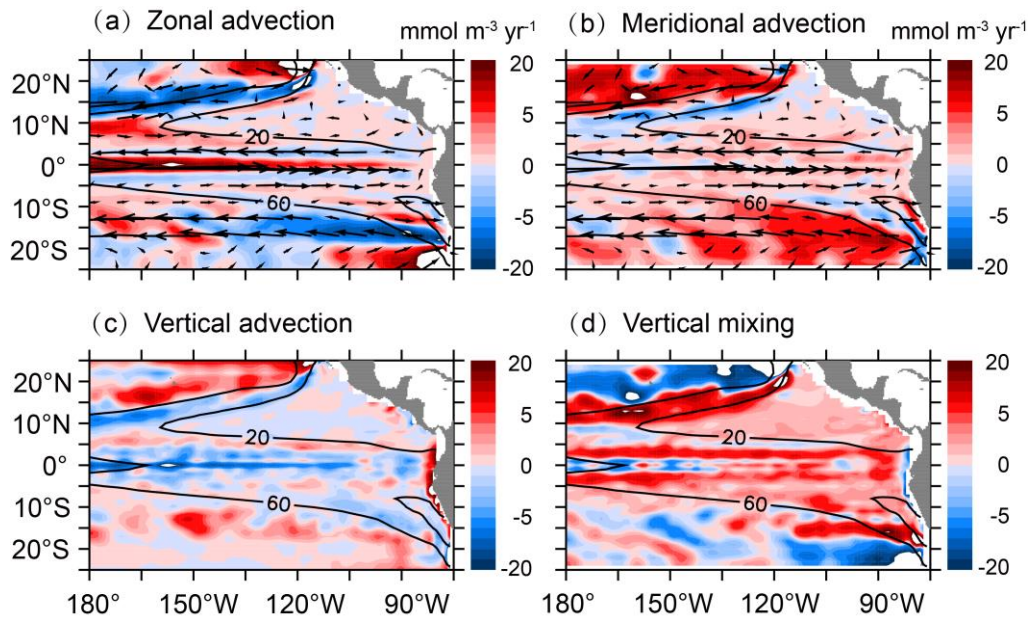

15

**Figure S2.** DO supply averaged over 200-700 m from Km18.7Kb0.5 through (a) zonal advection, (b) meridional advection, (c) vertical advection, and (d) vertical mixing. The black arrows in (a) and (b) denote the direction and strength of currents. Black lines in (a-d) denote contours of DO concentrations of 20 mmol m<sup>-3</sup> and 60 mmol m<sup>-3</sup> from the best simulation (Km18.7Kb0.5).

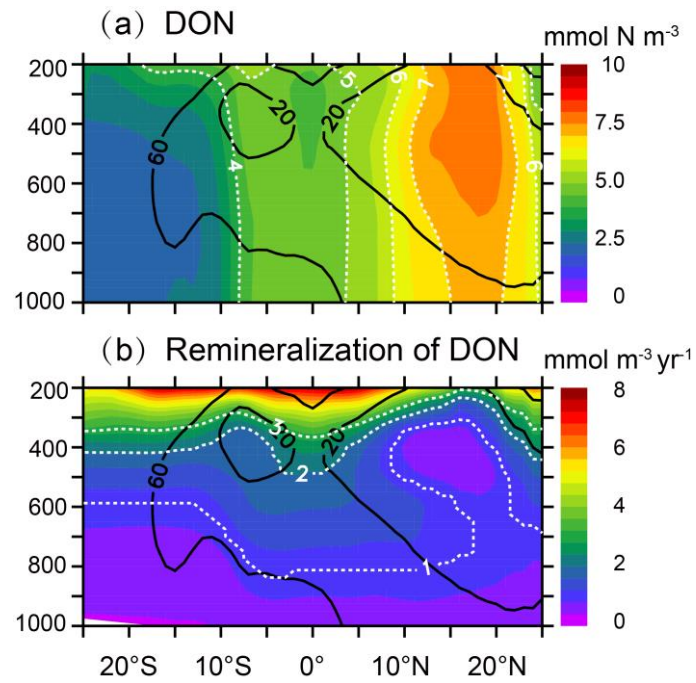

20

**Figure S3.** Vertical and horizontal distributions of (a) DON and (b) remineralization of DON from Km18.7Kb0.5 over 120-90°W. Black lines in (a and b) denote contours of DO concentrations of 20  $\text{mmol m}^{-3}$  and 60  $\text{mmol m}^{-3}$ .
